# Supplementary material for: Influence of polycrystalline material on crater shape optimization and roughness using low-power/low-pressure direct-current glow discharge mass spectrometry
Source: Royal Society of Chemistry journal article supplement (doi:10.1039/d0ja00055h), 2020-01-01
Supplement: d0ja00055h1.pdf [file d0ja00055h1.pdf]

## Supplementary Information

**Figure S1:** Relationship between sputtering rate in terms of weight loss and voltage for tantalum with small grains.....1

**Figure S2:** EBSD map overlaid over secondary electron micrograph for tantalum sample with large grains showing grain boundaries and differential sputtering after 2.5 h sputtering at discharge condition of 5 mA, 1 kV. Corresponding inverse pole figure legend to the right.....1

**Figure S3:** Flat crater profile for tantalum with small grains at discharge condition of 2.3 mA, 0.7 kV using 0.25 ml/min argon flow after sputtering for 1.5 h, zoomed with a different axis scale using Figure 1B.....2

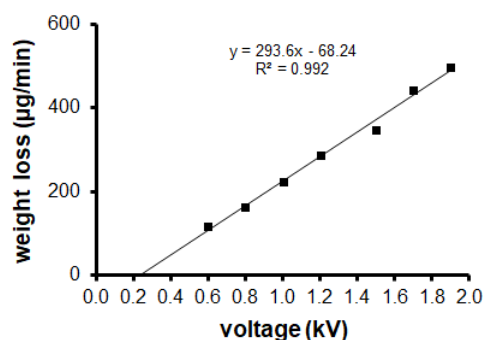

**Figure S1:** Relationship between sputtering rate in terms of weight loss and voltage for tantalum with small grains.

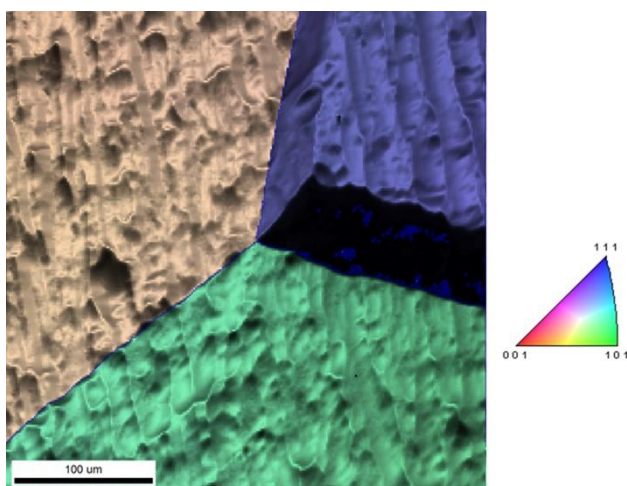

**Figure S2:** EBSD map overlaid over secondary electron micrograph for tantalum sample with large grains showing grain boundaries and differential sputtering after 2.5 h sputtering at discharge condition of 5 mA, 1 kV. Corresponding inverse pole figure legend to the right.

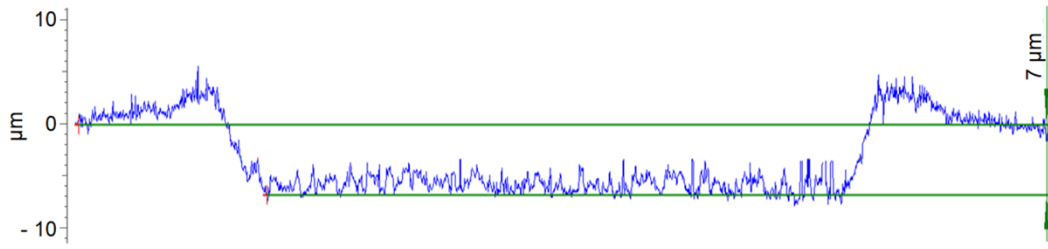

**Figure S3:** Flat crater profile for tantalum with small grains at discharge condition of 2.3 mA, 0.7 kV using 0.25 ml/min argon flow after sputtering for 1.5 h, zoomed with a different axis scale using Figure 1B.
